# Supplementary material for: A full picture of enzymatic catalysis by hydroxynitrile lyases from Hevea brasiliensis: protonation dependent reaction steps and residue-gated movement of the substrate and the product
Source: Royal Society of Chemistry journal article supplement (doi:10.1039/c4cp04032e), 2014-01-01
Supplement: c4cp04032e2.pdf [file c4cp04032e2.pdf]

TOC

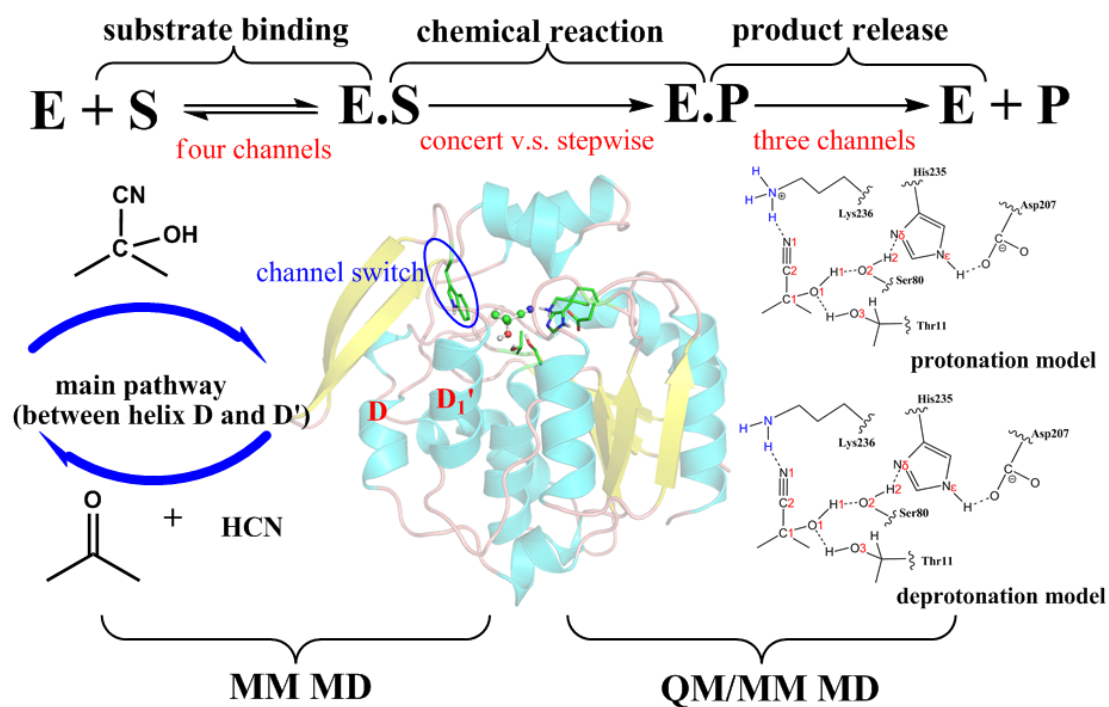

Full picture of the enzymatic catalysis by Hydroxynitrile Lyases from *Hevea Brasiliensis* (*HbHNL*), which comprises the protonation dependent chemical steps and the residue-gated movement of substrate and product.
